# Supplementary material for: Spot14/Mig12 heterocomplex sequesters polymerization and restrains catalytic function of human acetyl-CoA carboxylase 2
Source: PubMed Central journal article supplement — J Mol Recognit. 2013 Nov 11;26(12):679–88. doi: 10.1002/jmr.2313 (PMC4283044; doi:10.1002/jmr.2313), 2013-11-11
Supplement: jmr0026-0679-sd1.pdf [file jmr0026-0679-sd1.pdf]

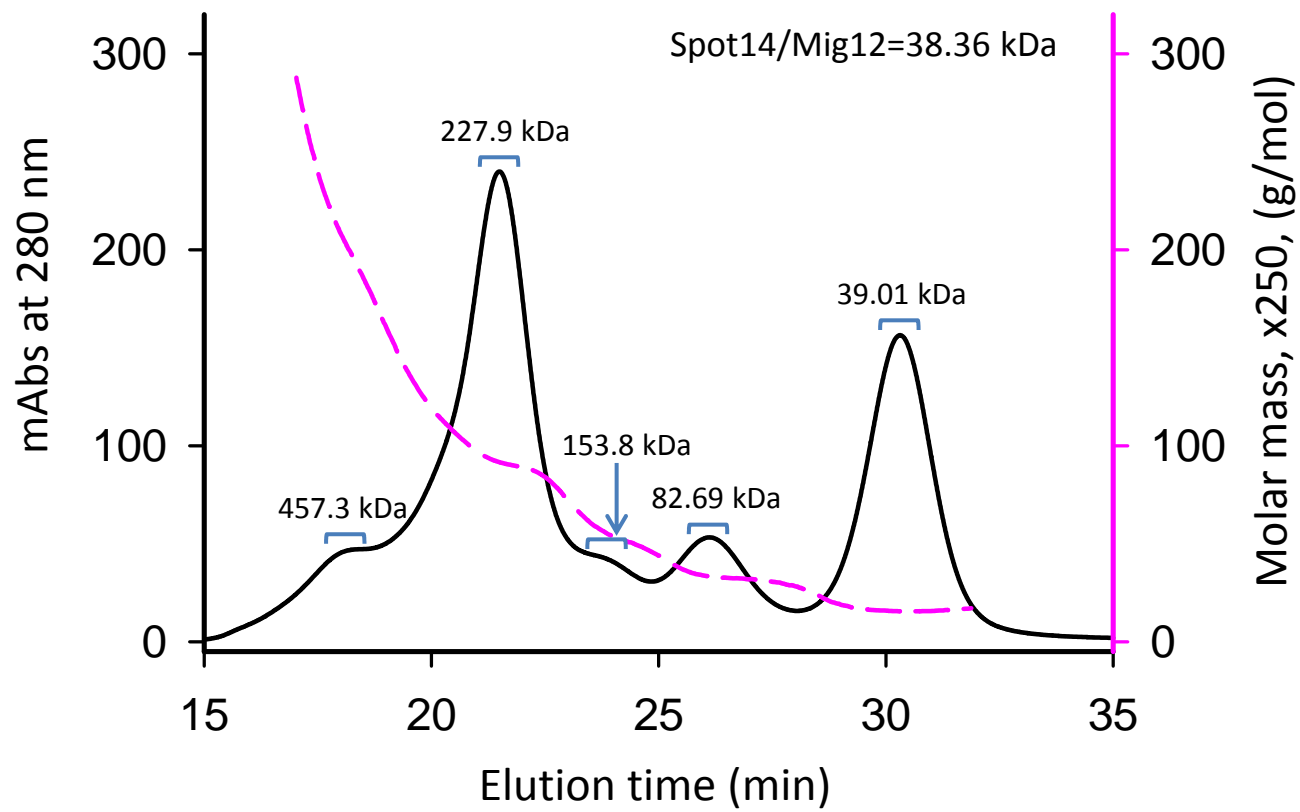

Supplementary Fig. 1

ACC2

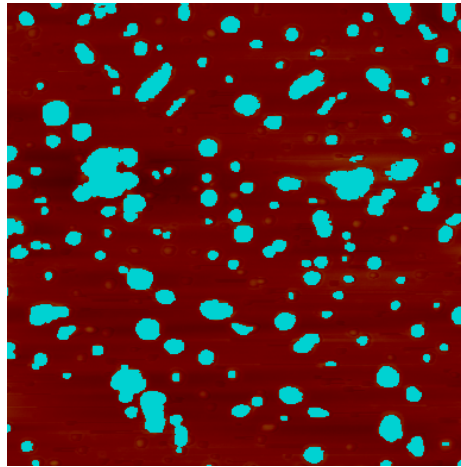

ACC2 + Cit

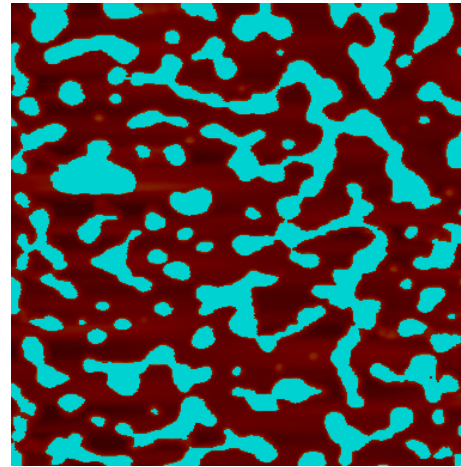

ACC2 + Cit + Spot14/Mig2  $\alpha\beta$

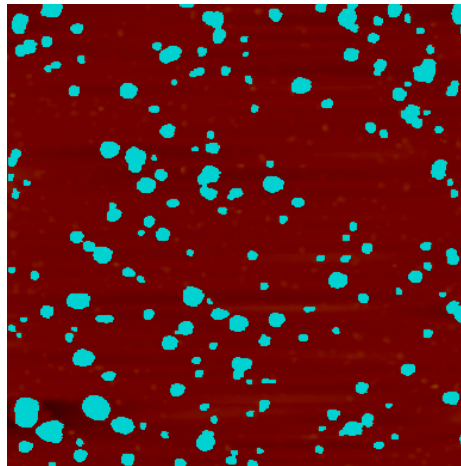

ACC2 + Cit + Spot14/Mig12 ( $\alpha\beta$ )<sub>6</sub>

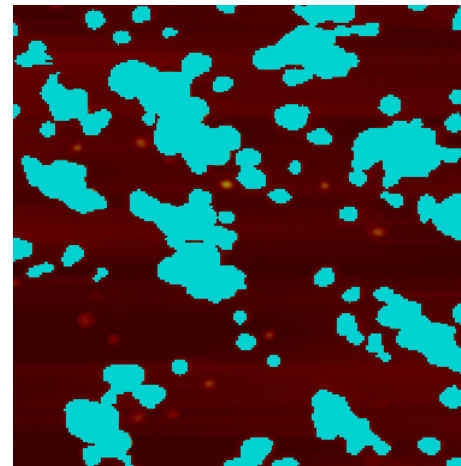

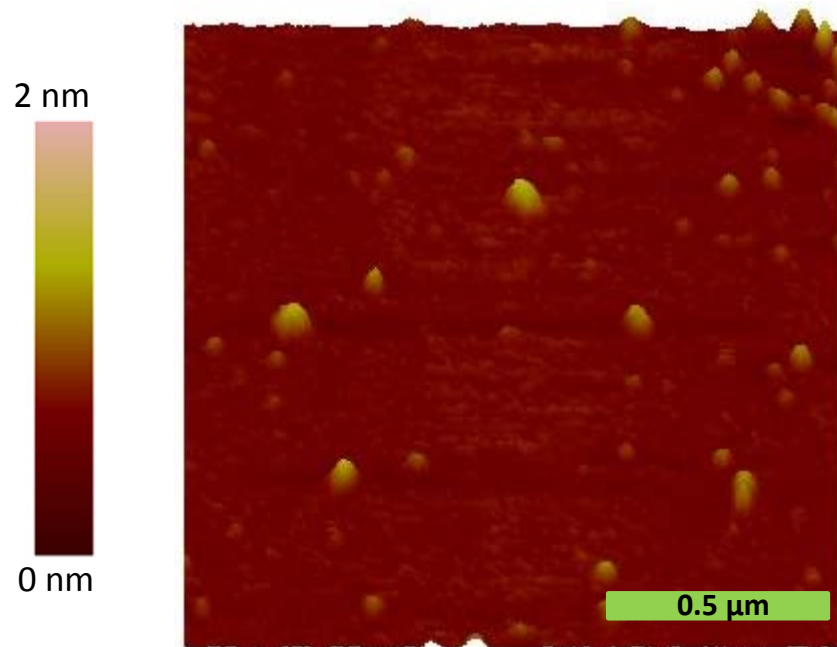

Supplementary Fig. 3
